## A PROTEIN TITRATION HYPOTHESIS FOR THE TEMPERATURE-DEPENDENCE OF TISSUE CO<sub>2</sub> CONTENT IN REPTILES AND AMPHIBIANS

J. N. STINNER\*, L. K. HARTZLER, M. R. GRGURIC AND D. L. NEWLON

Department of Biology, The University of Akron, Akron, OH 44325-3908, USA

\*e-mail: JStinner@UAkron.Edu

Accepted 17 November 1997; published on WWW 14 January 1998

### Summary

Whole-body CO<sub>2</sub> stores are known to increase with cooling in reptiles and amphibians ( $-\Delta[\text{CO}_2]/\Delta T$ ). The aim of this study was to determine the mechanism(s) producing this inverse relationship. The  $\Delta[\text{CO}_2]/\Delta T$  coefficients were determined for eight reptilian and one amphibian species and were found to differ by a factor of approximately 10, from  $-0.21 \text{ mmol kg}^{-1} \text{ }^\circ\text{C}^{-1}$  in the Mediterranean spur-thighed tortoise *Testudo graeca* to  $-0.02 \text{ mmol kg}^{-1} \text{ }^\circ\text{C}^{-1}$  in the bullfrog *Rana catesbeiana*. The  $\Delta[\text{CO}_2]/\Delta T$  coefficients were correlated with values in the literature for *in vivo* plasma  $\Delta\text{pH}/\Delta T$  coefficients ( $\Delta[\text{CO}_2]/\Delta T = -0.18 - 8.24 \Delta\text{pH}/\Delta T$ ;  $r^2 = 0.87$ ). Plasma electrolyte concentrations (Na<sup>+</sup>, K<sup>+</sup>, Ca<sup>2+</sup>, Mg<sup>2+</sup>, Cl<sup>-</sup>, inorganic phosphate, SO<sub>4</sub><sup>2-</sup> and lactate), [protein], [CO<sub>2</sub>], P<sub>CO<sub>2</sub></sub> and pH were measured in chronically cannulated resting black racer snakes *Coluber constrictor*. When the temperature was reduced from 30 to 10 °C, pH increased slightly (by  $-0.0028 \text{ pH units } ^\circ\text{C}^{-1}$ ), P<sub>CO<sub>2</sub></sub> decreased by 7 mmHg, [CO<sub>2</sub>] increased by  $3.2 \text{ mmol l}^{-1}$  and [HPO<sub>4</sub><sup>2-</sup>+H<sub>2</sub>PO<sub>4</sub><sup>-</sup>] increased by  $0.7 \text{ mmol l}^{-1}$ . Concentrations of protein and of the remaining electrolytes were not significantly different ( $P > 0.05$ ) at 30 and 10 °C. Net plasma protein charge, calculated from the

principle of electroneutrality (the sum of the cations in mequiv = the sum of anions in mequiv), was  $-0.48 \text{ mequiv g}^{-1} \text{ protein}$  at 30 °C and  $-0.38 \text{ mequiv g}^{-1} \text{ protein}$  at 10 °C. This 21 % decrease was attributed to the increases in [CO<sub>2</sub>] (i.e. carbonic acid) and inorganic phosphate concentration. Between 30 and 10 °C, skeletal muscle pH and [CO<sub>2</sub>] in *C. constrictor* increased (by  $-0.009 \text{ units } ^\circ\text{C}^{-1}$  and  $-0.125 \text{ mmol kg}^{-1} \text{ }^\circ\text{C}^{-1}$ , respectively), [Na<sup>+</sup>] and [Cl<sup>-</sup>] each decreased by approximately  $12 \text{ mequiv l}^{-1}$ , and [K<sup>+</sup>] and the percentage of water did not change significantly. It is concluded that the increase in whole-body CO<sub>2</sub> stores with cooling in reptiles and amphibians results from the passive effects of temperature changes upon the ionization constants of proteins and the active adjustment of P<sub>CO<sub>2</sub></sub> (ventilatory regulation), so that  $-\Delta\text{pK}$  is greater than  $-\Delta\text{pH}$ . Active transmembrane ion-exchange processes do not appear to be involved.

Key words: *Coluber constrictor*, reptiles, amphibians, temperature, respiratory exchange ratio, oxygen consumption, carbon dioxide production, acid–base balance, pH, protein charge, tissue carbon dioxide content, electrolytes, skeletal muscle.

### Introduction

Previously we reported changes in whole-body CO<sub>2</sub> stores, estimated from transients in CO<sub>2</sub> elimination, with temperature changes ( $\Delta\text{CO}_{2\text{WB}}/\Delta T$ ) in three species of reptiles and one amphibian species (Stinner and Wardle, 1988; Stinner *et al.* 1994a; Stinner, 1982). The  $\Delta\text{CO}_{2\text{WB}}/\Delta T$  coefficient varied from  $-0.18 \text{ mmol kg}^{-1} \text{ }^\circ\text{C}^{-1}$  in the black racer snake *Coluber constrictor* to  $-0.05 \text{ mmol kg}^{-1} \text{ }^\circ\text{C}^{-1}$  in the cane toad *Bufo marinus*. The absolute value of the plasma  $\Delta\text{pH}/\Delta T$  coefficient also differs among these species and is low in *C. constrictor* compared with *B. marinus* ( $-0.003 \text{ units } ^\circ\text{C}^{-1}$  versus  $-0.015 \text{ units } ^\circ\text{C}^{-1}$  between 30 and 10 °C, respectively; Stinner *et al.* 1996; Boutilier *et al.* 1987). This inverse relationship between the  $\Delta\text{CO}_{2\text{WB}}/\Delta T$  and  $\Delta\text{pH}/\Delta T$  coefficients suggests an explanation for the thermal dependence of CO<sub>2</sub> stores. When temperature is changed, the change in [CO<sub>2</sub>] is related to the nonbicarbonate buffer value ( $\beta_{\text{NB}}$ ), the change in the

ionization constant of the nonbicarbonate buffers ( $\Delta\text{pK}$ ) and  $\Delta\text{pH}$  by the expression  $\Delta[\text{HCO}_3^-] = \beta_{\text{NB}}(\Delta\text{pK} - \Delta\text{pH})$  (Heisler and Neuman, 1980; Heisler, 1986a). Thus, if  $\beta_{\text{NB}}$  and  $\Delta\text{pK}/\Delta T$  are similar among species,  $\Delta[\text{HCO}_3^-]$  (and hence the change in total [CO<sub>2</sub>]) will be greatest in species exhibiting the smallest change in pH. For example, the  $\Delta\text{pK}/\Delta T$  coefficient for 4-methyl-imidazole is  $-0.023 \text{ units } ^\circ\text{C}^{-1}$  (Figge *et al.* 1991a) and so, when body temperature changes, the absolute value of  $\Delta\text{pK} - \Delta\text{pH}$  is much greater in *C. constrictor* than in *B. marinus* ( $0.019$  versus  $0.007 \text{ units } ^\circ\text{C}^{-1}$ ). Consequently, there would be considerably more nonbicarbonate buffering of CO<sub>2</sub>, with concomitant changes in net imidazole charge, in *C. constrictor* than in *B. marinus*.

This study tests the hypothesis that the increase in whole-body CO<sub>2</sub> stores with cooling results from titration of proteins by carbonic acid. We estimated  $\Delta[\text{CO}_2]_{\text{WB}}/\Delta T$

coefficients in eight additional species of reptiles and one additional amphibian species from measurements of the respiratory exchange ratio (rate of CO<sub>2</sub> elimination/rate of O<sub>2</sub> uptake), and compared  $\Delta[\text{CO}_2]_{\text{WB}}/\Delta T$  coefficients with values from the literature for  $\Delta\text{pHpl}/\Delta T$  coefficients. In addition, we estimated net plasma protein charge in *C. constrictor* at 30 and 10 °C from the principle of electroneutrality. Strong ions (Na<sup>+</sup>, K<sup>+</sup>, Ca<sup>2+</sup>, Mg<sup>2+</sup>, Cl<sup>-</sup>, SO<sub>4</sub><sup>2-</sup>, lactate), inorganic phosphate, protein concentration, total [CO<sub>2</sub>], P<sub>CO<sub>2</sub></sub> and pH were measured in plasma at the two temperatures in resting chronically cannulated black racer snakes under steady-state conditions. The interspecific  $\Delta\text{CO}_2_{\text{WB}}/\Delta T$  coefficients were found to be strongly correlated with the interspecific  $\Delta\text{pHpl}/\Delta T$  coefficients, and net plasma protein charge in *C. constrictor* fell by 21%. Furthermore, between 30 and 10 °C, [CO<sub>2</sub>] of skeletal muscle in *C. constrictor* increased, without corresponding changes in intracellular [Na<sup>+</sup>], [K<sup>+</sup>] or [Cl<sup>-</sup>]. The findings of this study support the hypothesis that the thermal dependence of whole-body CO<sub>2</sub> stores in reptiles and amphibians results from the titration of protein by CO<sub>2</sub>.

## Materials and methods

### Animals

Animals were purchased from commercial suppliers, except for painted turtles (*Chrysemys picta*) and snapping turtles (*Chelydra serpentina*) which were collected locally. They were housed in the animal facility at The University of Akron, where room temperature was maintained at 25–30 °C. The cages contained light bulbs set to a 12 h:12 h L:D cycle that provided basking sites at 35–40 °C. Approximately once weekly, the snakes, American alligators (*Alligator mississippiensis*), savannah monitors (*Varanus exanthematicus*), snapping turtles and bullfrogs (*Rana catesbeiana*) were fed on mice and rats. The desert iguanas (*Dipsosaurus dorsalis*), painted turtles and Mediterranean spur-thighed tortoises (*Testudo graeca*) were fed on canned dog food, fruit and vegetables several times each week. All animals used in this study appeared to be in excellent health. The animals were starved for 1 week prior to experimentation in order to avoid metabolic, acid–base and electrolyte changes associated with the digestion and absorption of food.

### Metabolism studies

Net changes in whole-body CO<sub>2</sub> stores caused by changes in body temperature were assessed indirectly from measurements of the respiratory exchange ratio (RE). Rates of O<sub>2</sub> consumption ( $\dot{V}_{\text{O}_2}$ ) and CO<sub>2</sub> production ( $\dot{V}_{\text{CO}_2}$ ) in undisturbed animals were determined in a sealed recirculating apparatus housed inside a darkened temperature-controlled cabinet (Precision Scientific, model 815, ±1 °C). The details of this apparatus and the procedure followed have been described previously (Stinner *et al.* 1994a). Briefly, animals were allowed to adjust to the experimental apparatus for 24 h. The chamber was then sealed, and air was recirculated at

2.1–2.51 min<sup>-1</sup>. A portion of the recirculated air was continuously passed through a Drierite column and O<sub>2</sub> and CO<sub>2</sub> analyzers (Ametek S-3A and CD-3A; Ametek, Pittsburgh, PA, USA). The analyzers were calibrated with dry, CO<sub>2</sub>-free room air and a 5% CO<sub>2</sub> (balance N<sub>2</sub>) certified gas mixture. The metabolism chamber was flushed with room air when the O<sub>2</sub> levels had fallen to no lower than 19% and/or the CO<sub>2</sub> levels had risen to a maximum of 1.0%.  $\dot{V}_{\text{O}_2}$  and  $\dot{V}_{\text{CO}_2}$  were calculated using the equations for closed-system respirometry given by Stinner *et al.* (1994a). Net changes in whole-body CO<sub>2</sub> stores caused by changing the temperature were estimated from the differences between nonsteady-state and steady-state (control) RE values (see Stinner, 1982, for details of the integration procedure). The animals remained inside the metabolism apparatus for up to 3 weeks. They appeared to be in excellent condition at the end of these studies. The temperatures used and masses of each species are listed in Table 1.

### Surgery and blood analyses

The dorsal aorta of 49 *C. constrictor* (mean mass 217±87 g) was occlusively cannulated (PE 50 or PE 10) as described by Stinner *et al.* (1996). After a recovery period of at least 72 h, the snakes were placed inside individual chambers within a darkened Precision temperature-controlled cabinet. The trailing ends of the cannulas extended outside the cabinets so that blood could be sampled without disturbing the snakes. Additional details of this apparatus and the blood sampling procedure (see below) are given in Stinner *et al.* (1996). The snakes were left undisturbed for 24 h at 30 °C and 20 °C and for 48 h at 10 °C before blood sampling began to allow them to achieve steady state with respect to whole-body CO<sub>2</sub> stores.

For P<sub>CO<sub>2</sub></sub>, pH and [CO<sub>2</sub>] measurements, a train of four heparinized microhematocrit tubes was connected to a cannula and filled with a total volume of approximately 300 µl of blood. The capillary tube train was then immediately sealed and immersed in iced water. All blood sample analyses of P<sub>CO<sub>2</sub></sub>, pH and [CO<sub>2</sub>] were completed within 1 h of collection. P<sub>CO<sub>2</sub></sub> and pH were measured on blood from two and one of the microcapillary tubes, respectively, using Radiometer BMS-3 electrodes thermostatted to the snake's body temperature and PHM 72 acid–base analyzers (Radiometer, Copenhagen, Denmark). The P<sub>CO<sub>2</sub></sub> electrode was calibrated using a 1.39% CO<sub>2</sub> mixture supplied by mass-flow controllers (Tylan Corp., Torrance, CA, USA). The pH electrode was calibrated using Radiometer precision buffers. Plasma [CO<sub>2</sub>] was determined in duplicate on the fourth microcapillary tube using a Capni-con 3a CO<sub>2</sub> analyzer (Cameron Instrument Co., Port Aransas, TX, USA). pK<sub>1</sub>' was calculated for each blood sample using the solubility coefficients given by Severinghaus (1965) (see Table 3). Snakes at 10 °C were sampled once each day for four consecutive days and snakes at 30 °C were sampled once each day for 2 days. Replicate values for each snake were then averaged before calculating group means ± S.D.

For analyses of ion concentrations, approximately 450 µl of

Table 1. Oxygen consumption rates of animals kept at constant temperature for at least 24 h (temperature  $\geq 30^\circ\text{C}$ ) or for at least 48 h (temperature  $\leq 15^\circ\text{C}$ )

| Species                                                          | Body mass<br>(g) | Rate of oxygen consumption (ml kg <sup>-1</sup> h <sup>-1</sup> ) |          |           |         |         |         |
|------------------------------------------------------------------|------------------|-------------------------------------------------------------------|----------|-----------|---------|---------|---------|
|                                                                  |                  | 40 °C                                                             | 35 °C    | 30 °C     | 15 °C   | 10 °C   | 5 °C    |
| Savannah monitor (4)<br><i>Varanus exanthematicus</i>            | 654±100          |                                                                   | 75.9±3.7 |           | 8.4±2.0 |         |         |
| Mediterranean spur-thighed tortoise (5)<br><i>Testudo graeca</i> | 642±138          |                                                                   |          | 32.1±1.7  |         | 4.0±2.6 |         |
| Coachwhip snake (4)<br><i>Masticophis flagellum</i>              | 488±86           |                                                                   |          | 54.1±11.3 |         | 5.2±0.9 |         |
| American alligator (4)<br><i>Alligator mississippiensis</i>      | 180±55           |                                                                   |          | 65.5±2.1  |         | 7.7±2.1 |         |
| Painted turtle (4)<br><i>Chrysemys picta</i>                     | 509±88           |                                                                   |          | 66.9±6.4  |         | 5.2±1.5 |         |
| Snapping turtle (7)<br><i>Chelydra serpentina</i>                | 2,460±1,682      |                                                                   |          | 38.7±9.5  |         | 3.6±0.8 |         |
| Western diamondback rattlesnake (5)<br><i>Crotalus atrox</i>     | 1,256±1,103      |                                                                   |          | 48.1±18.2 |         | 6.0±2.7 |         |
| Desert iguana (5)<br><i>Dipsosaurus dorsalis</i>                 | 47.2±11.8        | 142.5±18.2                                                        |          |           | 8.6±1.6 |         |         |
| Bullfrog (6)<br><i>Rana catesbeiana</i>                          | 608±65           |                                                                   |          | 72.9±6.4  |         |         | 3.7±0.8 |

Values in parentheses are the number of animals sampled.  
Values for body mass and  $\dot{V}_{\text{O}_2}$  are means  $\pm$  S.D.

whole blood was collected directly into heparinized microcapillary tubes and immediately centrifuged at 2000g for 5 min in an Eppendorf microcentrifuge. For lactate analysis, 100  $\mu\text{l}$  of the plasma was immediately deproteinized by adding 200  $\mu\text{l}$  of a cold 8% perchloric acid solution. The mixture was centrifuged at 15 000g for 10 min, and the supernatant was then frozen for no more than 1 week before plasma [lactate] analysis using an enzymatic test kit (Sigma no. 726-uv/826-uv) and Coleman Jr II model 6/20 spectrophotometer. The remaining plasma was frozen for future determination of ion concentrations.

Plasma [Na<sup>+</sup>] and [K<sup>+</sup>] were analyzed in duplicate using flame photometry (Coleman model 51; Bacharach, Inc., Pittsburgh, PA, USA). Plasma [Cl<sup>-</sup>] was measured (six replicates) using a Digital chloridometer (Buchler Instr., Lenexa, KS, USA). Total plasma osmolality was determined in duplicate using a model 5500 vapor pressure osmometer (Wescor, Inc, Logan, UT, USA). Means of the replicates were used to calculate group means  $\pm$  S.D. for tabulation. Total plasma Ca<sup>2+</sup>, Mg<sup>2+</sup>, inorganic phosphate and protein concentrations were determined using Sigma diagnostic test kits (procedure nos 587, 595, 360-uv and 690, respectively; Sigma Diagnostics, St Louis, MO, USA). Calibration curves were constructed for [protein] from Sigma protein standards provided with the diagnostic kit, for [Ca<sup>2+</sup>] and [phosphate] from Sigma standards no. 360-11, and for [Mg<sup>2+</sup>] from Sigma standards no. 595-11. [SO<sub>4</sub><sup>2-</sup>] was determined using high-pressure liquid chromatography (Dionex HPLC 2010i; Dionex Corp., Sunnyvale, CA, USA).

#### Skeletal muscle

Skeletal muscle [CO<sub>2</sub>] was measured using the technique described by Stinner *et al.* (1994a). Twelve black racer snakes (mean mass 158±93 g) and 42 bullfrogs (mean mass 353±84 g) were individually housed inside Precision temperature cabinets at 30 or 10 °C, as described above. The bullfrogs had access to water (10–15 cm deep) as well as dry areas. After at least 48 h at 30 °C and 96 h at 10 °C, animals were gently taken by hand from the temperature cabinets and decapitated. The spinal cord of the bullfrogs was immediately pithed, and their deep body temperature was taken using a Schultheis quick-reading cloacal thermometer. Duplicate pieces of skeletal muscle weighing 0.2–0.3 g were swiftly harvested and added to 0.7 ml of 0.1 mol l<sup>-1</sup> NaOH for soaking overnight in sealed bottles. [CO<sub>2</sub>] of the solution was measured for each bottle in duplicate using a Capni-con 3a CO<sub>2</sub> analyzer. The four [CO<sub>2</sub>] measurements for each muscle were then averaged before calculation of group means  $\pm$  S.D.

Analysis of intracellular pH (pHi) in 19 black racer snakes (mean mass 170±88 g) was performed on muscle homogenates after metabolic inhibition according to the method of Pörtner *et al.* (1990). The snakes were housed inside Precision temperature cabinets for at least 48 h at 30 °C and 96 h at 10 °C. The cabinets were then briefly opened, and gauze soaked in isoflurane was dropped into the chambers. The chambers were then sealed for 15–20 min. The anesthetized snakes were removed and immediately decapitated. Four muscle samples (a combination of the transversospinalis, longissimus dorsi and iliolumbaris) were quickly taken from the mid-region of each

snake, freeze-clamped and stored in liquid N<sub>2</sub> for up to 2 h. Additional muscle samples were taken for electrolyte and water content determinations (see below). Frozen muscle samples were rapidly transferred to a porcelain mortar half-filled with liquid N<sub>2</sub> inside an ice chest and ground to a fine powder using a pre-cooled pestle. Grinding typically took 1 min. Approximately 150 mg of the powder was rapidly strained under the liquid N<sub>2</sub> atmosphere of the mortar and transferred to a 500 µl Eppendorf microcentrifuge tube containing 200 µl of ice-cold inhibitor solution (150 mmol<sup>-1</sup> potassium fluoride, 5 mmol<sup>-1</sup> nitrilotriacetic acid; pH approximately 7.00). The transferred powder was quickly covered with the inhibitor solution and mixed with a needle in order to release the N<sub>2</sub> bubbles from the thawed tissue powder. The microcentrifuge tube was then filled with the inhibitor solution and capped. The mixture was agitated for 3 s using a vortex mixer, centrifuged for 20 s at maximal speed in an Eppendorf centrifuge, and stored in ice for no more than 1 h. The supernatant pH was repeatedly measured using a Radiometer BMS-3 pH electrode thermostatted to the snake's body temperature and a PHM 72 acid-base analyzer. At least three pH measurements from each centrifuge tube were averaged, and the pH of the four muscle samples from each snake was averaged before calculation of group means ± s.d. In two snakes held at 10 °C and three snakes held at 30 °C, additional samples of the muscle powder were prepared and analyzed as described above, except that pH was measured at 30 °C and at 10 °C, respectively. The difference in supernatant pH between the 10 and 30 °C samples taken from the same ground muscle powder was used to determine the passive component of the temperature-dependent adjustment of pHi.

Muscle samples weighing approximately 0.25 g were analyzed for [Na<sup>+</sup>], [K<sup>+</sup>] and [Cl<sup>-</sup>] according to the method of Boutilier *et al.* (1986). Four samples from each of 25 *C. constrictor* (mean mass 167±80 g) were placed in tared vials containing 4 ml of 0.1 mol<sup>-1</sup> HNO<sub>3</sub>, weighed, and gently shaken for 24 h at room temperature. Dissolved [Na<sup>+</sup>], [K<sup>+</sup>] and [Cl<sup>-</sup>] were determined as described above for plasma. Four additional muscle samples from 21 of the snakes were weighed and dried overnight to a constant mass at 60 °C.

### Statistics

Comparisons between values were performed using paired *t*-tests, Student's *t*-tests and least-squares regression. Significance was assumed when *P*<0.05. Means ± s.d. are reported for group values.

## Results

### Metabolism and whole-body CO<sub>2</sub> stores

Metabolic rates ( $\dot{V}_{O_2}$ ) for the nine species studied are listed in Table 1. These rates are for animals kept for at least 24 h at the specified body temperatures. They do not necessarily represent minimal resting values because the animals were occasionally active inside the metabolic chambers, especially at 30–40 °C. This probably accounts for the high thermal quotients ( $Q_{10}>3$ ) evident in Table 1 (e.g.  $Q_{10}$  for *C. picta* of 3.6).

Cooling and heating the animals produced transient decreases and increases, respectively, in the respiratory exchange ratio. In eight of the nine species studied, steady-state RE values were not significantly affected by temperature

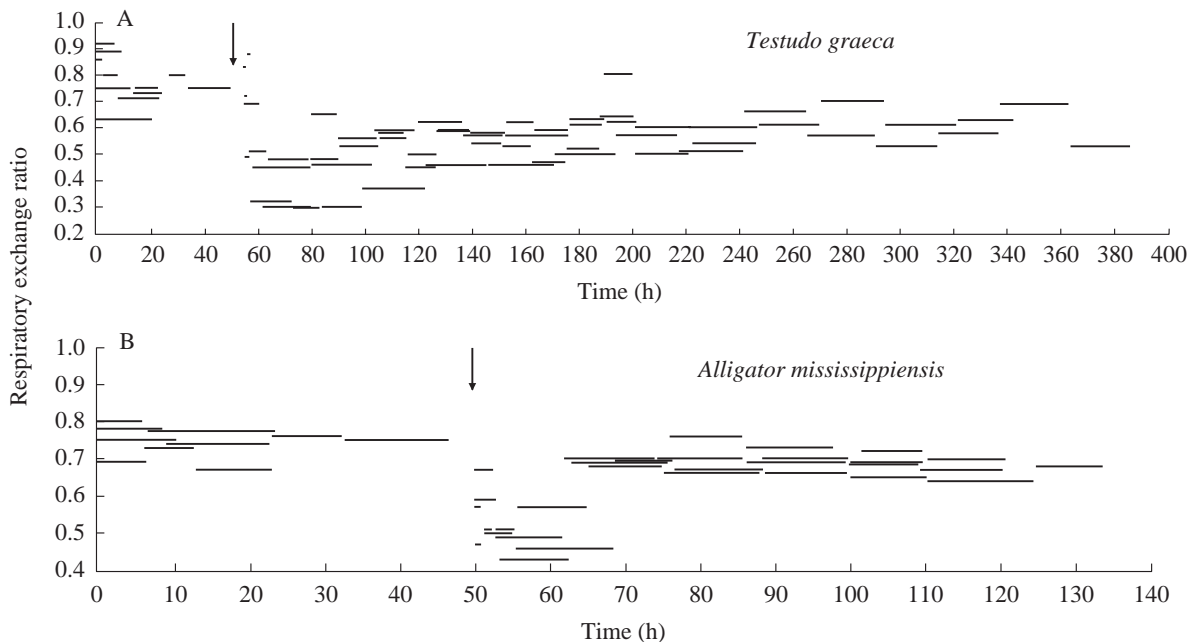

Fig. 1. Effect of lowering the temperature from 30 to 10 °C upon the respiratory exchange ratio in *Testudo graeca* (*N*=5) and *Alligator mississippiensis* (*N*=4). The length of the horizontal bars corresponds to the duration of individual measurement periods. The arrow at 50 h marks the time at which ambient temperature was lowered from 30 to 10 °C. The change in air temperature took 1.5–2 h to complete.

( $P>0.05$ ). However, in *T. graeca*, mean steady-state RE at 30 °C ( $0.78\pm0.08$ ) was significantly higher than mean RE measured after 150 h at 10 °C ( $0.61\pm0.06$ ), suggesting that the animals still had not returned to steady state. Estimates of changes in whole-body CO<sub>2</sub> stores in *T. graeca* at 10 °C were made using the 30 °C steady-state RE values. As expected, there were large differences among species, as illustrated by comparing *T. graeca* with *A. mississippiensis* (Figs 1, 2). Cooling *T. graeca* from 30 to 10 °C reduced the RE to approximately 0.3–0.5, which was then followed by a gradual increase in RE (Fig. 1A). Heating the tortoises back to 30 °C resulted in a sharp increase in RE to well above 1.0, and even above 2.0 in one tortoise, and then a return to steady state by approximately 12 h (Fig. 2A). The effect of temperature changes upon the RE was smaller in *A. mississippiensis*. Lowering body temperature from 30 to 10 °C lowered the RE

to approximately 0.6–0.7, and steady state returned within approximately 20 h (Fig. 1B). Raising the temperature back to 30 °C increased the mean RE to a little above 1.0, and RE then returned to steady state within 5 h (Fig. 2B).

Calculated changes in whole-body CO<sub>2</sub> stores are listed in Table 2, and range from  $-0.21\pm0.10\text{ mmol kg}^{-1}\text{ }^{\circ}\text{C}^{-1}$  in *T. graeca* to  $-0.02\pm0.02\text{ mmol kg}^{-1}\text{ }^{\circ}\text{C}^{-1}$  in *R. catesbeiana*. In addition to the nine species measured in this study, Table 2 contains  $\Delta\text{CO}_2/\Delta T$  coefficients for four species taken from earlier reports and  $\Delta\text{pHpl}/\Delta T$  coefficients available for 10 of the species. There is a significant correlation ( $r^2=0.87$ ,  $P<0.01$ ) between  $\Delta\text{CO}_2/\Delta T$  and  $\Delta\text{pHpl}/\Delta T$  (Fig. 3). Least-squares linear regression yields  $\Delta\text{CO}_2/\Delta T=-0.18-8.24\Delta\text{pHpl}/\Delta T$ , where  $\Delta\text{CO}_2/\Delta T$  is in  $\text{mmol kg}^{-1}\text{ }^{\circ}\text{C}^{-1}$  and  $\Delta\text{pH}/\Delta T$  is in pH units  $^{\circ}\text{C}^{-1}$ . The equation predicts that a  $\Delta\text{pHpl}/\Delta T=-0.022$  units  $^{\circ}\text{C}^{-1}$  will result in no changes in whole-body CO<sub>2</sub> stores with changes in temperature (x-intercept of the line) and that a  $\Delta\text{pHpl}/\Delta T=0.0$  units  $^{\circ}\text{C}^{-1}$  will result in a whole-body change in CO<sub>2</sub> stores of  $-0.18\text{ mmol kg}^{-1}\text{ }^{\circ}\text{C}^{-1}$  (y-intercept of the line).

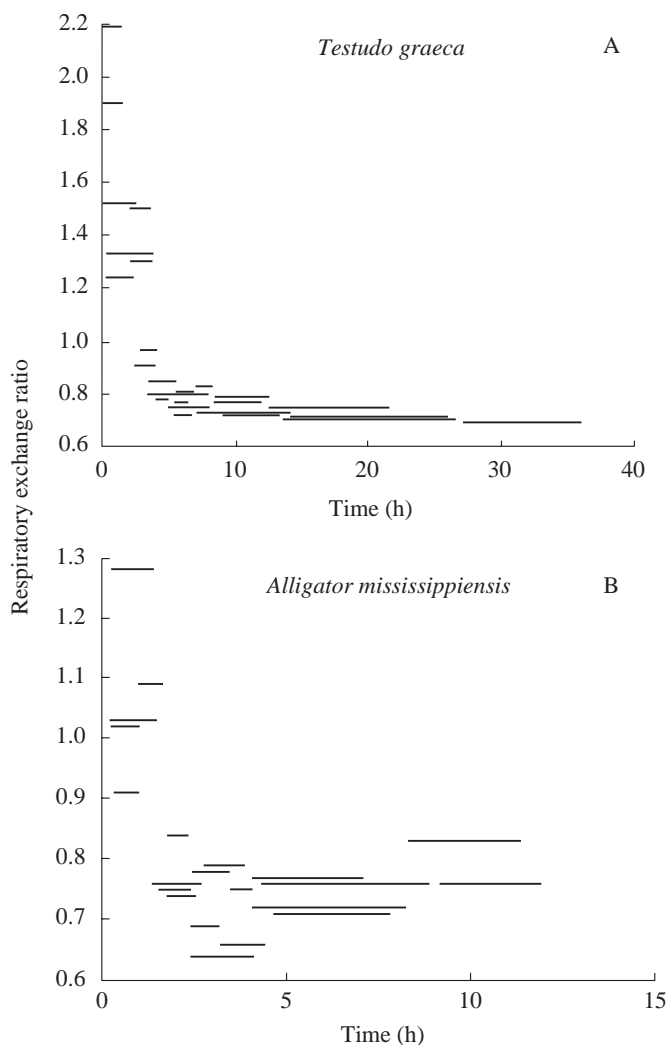

Fig. 2. Effect of raising the temperature from 10 back to 30 °C upon the respiratory exchange ratio in five *Testudo graeca* and four *Alligator mississippiensis*. Symbols as in Fig. 1. Air temperature was raised at the conclusion of the measurements at 10 °C (see Fig. 1) and took 1.5–2 h to reach 30 °C.

Table 2. Changes in whole-body CO<sub>2</sub> stores and plasma pH with changes in body temperature

| Species                                                   | $\Delta[\text{CO}_2]/\Delta T$<br>( $\text{mmol kg}^{-1}\text{ }^{\circ}\text{C}^{-1}$ ) | $\Delta\text{pH}/\Delta T$<br>(units $^{\circ}\text{C}^{-1}$ ) |
|-----------------------------------------------------------|------------------------------------------------------------------------------------------|----------------------------------------------------------------|
| Mediterranean spur-thighed tortoise <i>Testudo graeca</i> | $-0.21\pm0.10$<br>(5)                                                                    |                                                                |
| Black racer snake <i>Coluber constrictor</i>              | $-0.18\pm0.07$<br>(4)                                                                    | $-0.0028$                                                      |
| Savannah monitor <i>Varanus exanthematicus</i>            | $-0.12\pm0.03$<br>(4)                                                                    | $-0.005$                                                       |
| Coachwhip snake <i>Masticophis flagellum</i>              | $-0.11\pm0.07$<br>(4)                                                                    |                                                                |
| Slider turtle <i>Trachemys scripta</i>                    | $-0.11\pm0.04$<br>(2)                                                                    | $-0.010$                                                       |
| American alligator <i>Alligator mississippiensis</i>      | $-0.07\pm0.04$<br>(4)                                                                    | $-0.0125$                                                      |
| Painted turtle <i>Chrysemys picta</i>                     | $-0.07\pm0.05$<br>(4)                                                                    | $-0.011$                                                       |
| Bullsnake <i>Pituophis catenifer</i>                      | $-0.05\pm0.01$<br>(4)                                                                    | $-0.0157$                                                      |
| Cane toad <i>Bufo marinus</i>                             | $-0.05\pm0.04$<br>(6)                                                                    | $-0.015$                                                       |
| Snapping turtle <i>Chelydra serpentina</i>                | $-0.05\pm0.04$<br>(7)                                                                    | $-0.018$                                                       |
| Desert iguana <i>Dipsosaurus dorsalis</i>                 | $-0.04\pm0.04$<br>(5)                                                                    | $-0.0145$                                                      |
| Western diamondback rattlesnake <i>Crotalus atrox</i>     | $-0.04\pm0.06$<br>(5)                                                                    |                                                                |
| Bullfrog <i>Rana catesbeiana</i>                          | $-0.02\pm0.02$<br>(6)                                                                    | $-0.0206$                                                      |

$\Delta[\text{CO}_2]/\Delta T$  values are reported as means  $\pm$  s.d.

Numbers in parentheses are the number of animals sampled.

$\Delta\text{pH}/\Delta T$  values were taken from Jackson (1986) and Table 3 for *Coluber constrictor*.

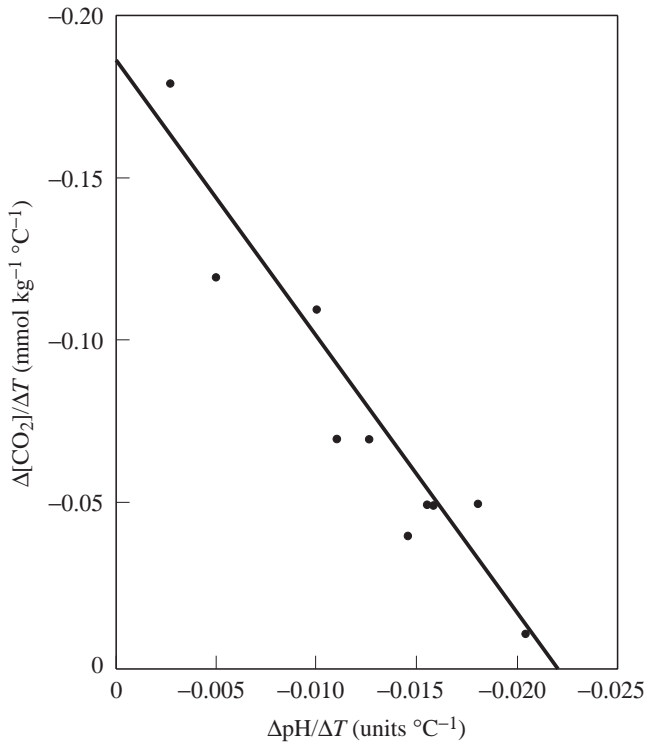

Fig. 3. Thermal dependence of whole-body CO<sub>2</sub> stores versus thermal dependence of plasma pH in 10 species of reptiles and amphibians. Values are taken from Table 2. The line represents the least-squares regression ( $y = -0.18 - 8.24x$ ,  $r^2 = 0.87$ ,  $P < 0.01$ ).

#### Plasma CO<sub>2</sub>, pH and electrolytes

Although mean plasma pH in *C. constrictor* was higher by 0.056 units at 10 versus 30 °C (Table 3), the difference was not significant ( $P < 0.1$ ).  $P_{CO_2}$  was 7.1 mmHg lower, and total plasma [CO<sub>2</sub>] was 3.2 mmol l<sup>-1</sup> higher, at 10 versus 30 °C. The values for  $P_{CO_2}$  and pH at 30 °C listed in Table 3 also include measurements for five snakes from previous work in this laboratory (Stinner and Wardle, 1988). Plasma [HCO<sub>3</sub><sup>-</sup>] and dissolved [CO<sub>2</sub>] were estimated from mean total [CO<sub>2</sub>] and mean  $P_{CO_2}$  using the solubility coefficients listed in Table 3. Between 30 and 10 °C, [HCO<sub>3</sub><sup>-</sup>] increased by 3.1 mmol l<sup>-1</sup> and dissolved [CO<sub>2</sub>] remained virtually unchanged.  $pK_1'$  was slightly but significantly higher (0.111 units) at 10 °C.

Inspection of Table 4 reveals that plasma electrolyte concentrations were largely unaffected by cooling the snakes from 30 to 10 °C. Only [phosphate] changed significantly, increasing by 0.7 mmol l<sup>-1</sup>. However, at 20 °C, the concentrations of several electrolytes (Na<sup>+</sup>, K<sup>+</sup>, Mg<sup>2+</sup> and phosphate) were significantly different from those at 10 and/or 30 °C. The higher [Na<sup>+</sup>] at 20 °C appeared to have been accompanied by a higher [Cl<sup>-</sup>]. There was no effect of temperature upon [protein]. Protein charge (in mequiv l<sup>-1</sup>) was calculated as (the sum of the concentrations of Na<sup>+</sup>, K<sup>+</sup>, 2×Ca<sup>2+</sup> and 2×Mg<sup>2+</sup>) minus (the sum of the concentrations of Cl<sup>-</sup>, lactate, 2×SO<sub>4</sub><sup>2-</sup>, 2×HPO<sub>4</sub><sup>2-</sup> and H<sub>2</sub>PO<sub>4</sub><sup>-</sup>). The concentrations of HPO<sub>4</sub><sup>2-</sup> and H<sub>2</sub>PO<sub>4</sub><sup>-</sup> were estimated using the Henderson-Hasselbalch equation, mean pH values from

Table 3. Steady-state values for systemic arterial plasma pH, carbon dioxide and oxygen in the snake *Coluber constrictor* at 30 and 10 °C

| Variable                                                   | 30 °C                | 10 °C                 |
|------------------------------------------------------------|----------------------|-----------------------|
| pH                                                         | 7.531±0.042<br>(10)  | 7.587±0.079<br>(8)    |
| $P_{CO_2}$ (mmHg)                                          | 21.5±2.5*<br>(10)    | 14.4±2.1<br>(8)       |
| Total [CO <sub>2</sub> ] (mmol l <sup>-1</sup> )           | 22.1±2.8*<br>(26)    | 25.3±2.0<br>(17)      |
| $\alpha_{CO_2}$ (mmol l <sup>-1</sup> mmHg <sup>-1</sup> ) | 0.0356               | 0.0629                |
| $pK_1'$                                                    | 6.069±0.016*<br>(5)  | 6.180±0.023<br>(6)    |
| [HCO <sub>3</sub> <sup>-</sup> ] (mmol l <sup>-1</sup> )   | 21.3                 | 24.4                  |
| Dissolved [CO <sub>2</sub> ] (mmol l <sup>-1</sup> )       | 0.8                  | 0.9                   |
| $P_{O_2}$ (mmHg)                                           | 75                   | 17                    |
| $\alpha_{O_2}$ (mmol l <sup>-1</sup> mmHg <sup>-1</sup> )  | 1.4×10 <sup>-3</sup> | 1.99×10 <sup>-3</sup> |
| Dissolved [O <sub>2</sub> ] (mmol l <sup>-1</sup> )        | 0.10                 | 0.03                  |

pH,  $P_{CO_2}$ , total [CO<sub>2</sub>] and  $pK_1'$ , are reported as means ± s.d.; numbers in parentheses are the number of animals used; \*indicates values significantly different ( $P < 0.05$ ) from those at 10 °C.

Dissolved [CO<sub>2</sub>] and [HCO<sub>3</sub><sup>-</sup>] were calculated from the mean values of total [CO<sub>2</sub>] and  $P_{CO_2}$ .

The solubility coefficients ( $\alpha$ ) for CO<sub>2</sub> and O<sub>2</sub> were taken from Severinghaus (1965) and Christoforides *et al.* (1969), respectively.

$P_{O_2}$  values were predicted from an equation in Stinner and Wardle (1988).

1 mmHg=0.1333 kPa.

Table 3 and a  $pK$  of 6.791 at 37 °C (Siggaard-Anderson, 1974). The van't Hoff equation [ $pK = (\Delta H^\circ / 4.576)(1/T_2 - 1/T_1)$ ] was used to correct  $pK$  to 30 and 10 °C, where  $\Delta H^\circ = 982$  cal mol<sup>-1</sup> (Edsall and Wyman, 1958). Protein charge decreased from -0.48 mequiv g<sup>-1</sup> protein at 30 °C to -0.38 mequiv g<sup>-1</sup> protein at 10 °C (Fig. 4), largely because of the increases in total [CO<sub>2</sub>] (carbonic acid) and inorganic [phosphate].

#### Skeletal muscle

Between 30 and 10 °C, [CO<sub>2</sub>] increased significantly by approximately 2.5 mmol kg<sup>-1</sup> in the three muscles studied in *C. constrictor* (Table 5). This contrasts sharply with the pattern found in *R. catesbeiana* (Table 6): in 14 skeletal muscles, only one exhibited a significant increase in [CO<sub>2</sub>] with cooling. Intracellular muscle pH in *C. constrictor* increased significantly with cooling ( $\Delta pHi/\Delta T = -0.009$  units °C<sup>-1</sup>; Table 7). The passive component was  $\Delta pHi/\Delta T = -0.013 \pm 0.001$  units °C<sup>-1</sup>. Muscle [Na<sup>+</sup>] and [Cl<sup>-</sup>] each decreased significantly by approximately 12 mequiv l<sup>-1</sup>, but there were no significant differences in [K<sup>+</sup>] or in percentage water content in snakes at 30 and 10 °C (Table 7).

#### Discussion

The temperature-dependence of whole-body CO<sub>2</sub> stores is

Table 4. Steady-state levels of systemic arterial plasma electrolytes in the snake *Coluber constrictor*

| Variable                                                 | 30 °C              | 20 °C              | 10 °C             |
|----------------------------------------------------------|--------------------|--------------------|-------------------|
| [Na <sup>+</sup> ] (mmol l <sup>-1</sup> )               | 154.5±3.5†<br>(18) | 158.2±5.4*<br>(13) | 153.9±5.9<br>(20) |
| [K <sup>+</sup> ] (mmol l <sup>-1</sup> )                | 3.7±0.6†<br>(13)   | 3.1±0.3*<br>(13)   | 3.9±0.5<br>(13)   |
| [Ca <sup>2+</sup> ] (mmol l <sup>-1</sup> )              | 2.9±0.4<br>(26)    | 2.7±0.3<br>(13)    | 2.8±0.3<br>(13)   |
| [Mg <sup>2+</sup> ] (mmol l <sup>-1</sup> )              | 1.2±0.2†<br>(11)   | 1.5±0.3*<br>(13)   | 1.2±0.35<br>(13)  |
| [Cl <sup>-</sup> ] (mmol l <sup>-1</sup> )               | 114.3±4.0<br>(9)   | 118.3±4.7<br>(9)   | 114.7±4.5<br>(9)  |
| [Phosphate] (mmol l <sup>-1</sup> )                      | 1.2±0.3*†<br>(13)  | 1.6±0.4*<br>(13)   | 1.9±0.4<br>(13)   |
| [Protein] (g l <sup>-1</sup> )                           | 47.7±10.9<br>(29)  | 45.5±11.1<br>(13)  | 44.8±9.0<br>(17)  |
| [SO <sub>4</sub> <sup>2-</sup> ] (mmol l <sup>-1</sup> ) | 2.3±0.6<br>(6)     | 2.8±1.2<br>(8)     | 2.6±0.6<br>(7)    |
| [Lactate] (mmol l <sup>-1</sup> )                        | 1.0±0.5<br>(13)    |                    | 0.8±0.2<br>(6)    |
| Osmolality (mmol kg <sup>-1</sup> )                      | 307±22<br>(14)     |                    |                   |

Values are means ± s.d., numbers in parentheses are the number of animals sampled.

Comparisons of values were performed using paired *t*-tests or *t*-tests for two means, and significance was assumed when *P*<0.05; \* indicates values that are significantly different from those at 10 °C; † indicates values that are significantly different from those at 20 °C.

Table 5. Steady-state skeletal muscle CO<sub>2</sub> levels in black racer snakes *Coluber constrictor*

| Muscle             | [CO <sub>2</sub> ] (mmol kg <sup>-1</sup> ) |           |
|--------------------|---------------------------------------------|-----------|
|                    | 30 °C                                       | 10 °C     |
| Transversospinalis | 11.2±1.5                                    | 13.9±1.4* |
| Longissimus dorsi  | 10.5±1.3                                    | 13.7±1.9* |
| Iliolumbaris       | 10.3±2.1                                    | 11.9±0.9* |

Values are reported as means ± s.d.

Six snakes were sampled at each temperature.

\*Indicates a value significantly different from that at 30 °C.

strongly correlated with changes in plasma pH per unit change in temperature in reptiles and amphibians (Table 2; Fig. 3): species exhibiting relatively small absolute ΔpH/Δ*T* coefficients experience greater changes in whole-body CO<sub>2</sub> stores. An explanation for this relationship is that, with differences between Δp*K* and ΔpH, there is titration of nonbicarbonate buffers by CO<sub>2</sub> (see Introduction). Assuming that the ΔpH<sub>p</sub>/Δ*T* coefficients correspond to whole-body ΔpH/Δ*T* coefficients, as reported by Bickler (1982) and by Cameron and Kormanik (1982), the absolute value of the slope in Fig. 3 (8.24 mmol kg<sup>-1</sup> pH unit<sup>-1</sup>) then represents a whole-body nonbicarbonate buffer value and

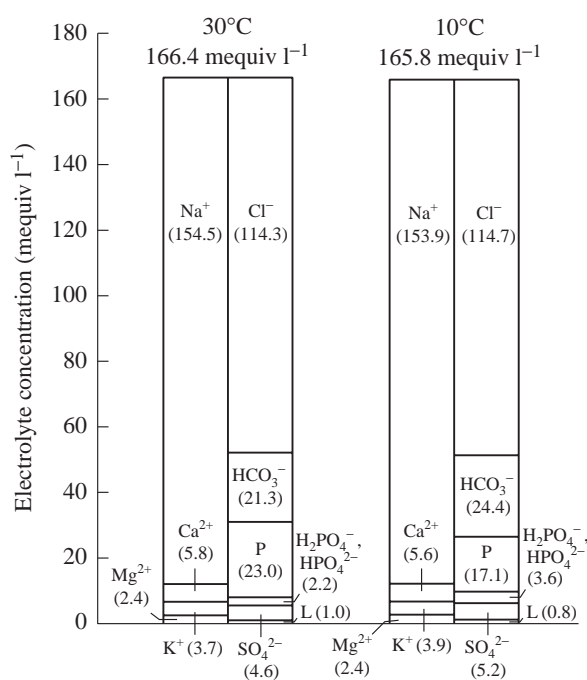

Fig. 4. Plasma electrolyte concentrations (in mequiv l<sup>-1</sup>) in the snake *Coluber constrictor* kept at 30 °C for 24 h or more and at 10 °C for 48 h or more. Values were calculated from the concentrations (in mmol l<sup>-1</sup>) listed in Tables 3 and 4. Note that the increase in [HCO<sub>3</sub><sup>-</sup>] between 30 and 10 °C was accompanied by a reduction in net negative protein charge, indicating titration of plasma proteins by carbonic acid. See text for additional explanation. L, lactate; P, protein.

Table 6. Steady-state skeletal muscle CO<sub>2</sub> level as a function of body temperature in bullfrogs *Rana catesbeiana*

| Muscle                           | [CO <sub>2</sub> ] (mmol l <sup>-1</sup> ) |            |
|----------------------------------|--------------------------------------------|------------|
|                                  | 28.1±0.6 °C                                | 9.5±1.5 °C |
| Submaxillary                     | 15.4±1.2                                   | 16.3±1.5   |
| Rectus abdominis                 | 12.8±1.2*                                  | 14.9±1.5   |
| Oblique (external plus internal) | 13.2±2.0                                   | 14.3±1.1   |
| Coccygeo-iliacus                 | 10.1±1.0                                   | 10.2±1.3   |
| Longissimus dorsi                | 11.1±1.0                                   | 10.7±1.2   |
| Iliolumbaris                     | 12.8±1.6                                   | 12.7±1.7   |
| Anconeus                         | 12.5±1.4                                   | 13.0±1.2   |
| Extensor carpi ulnaris           | 13.1±1.9                                   | 13.7±1.5   |
| Pectoralis                       | 12.1±1.8                                   | 11.9±1.3   |
| Triceps femoris                  | 13.8±3.7                                   | 13.0±2.6   |
| Semimembranosus                  | 13.1±3.5                                   | 13.2±2.6   |
| Gracilis major                   | 13.2±3.7                                   | 13.3±2.6   |
| Sartorius                        | 13.5±3.9                                   | 14.6±2.9   |
| Gastrocnemius                    | 13.3±3.6                                   | 13.1±2.9   |

Values are reported as means ± s.d.; each muscle was sampled from seven animals at each temperature and no more than five muscles were sampled from each animal.

\*Indicates values that are significantly different (*P*<0.05) from those at 9.5 °C.

Table 7. Steady-state values for skeletal muscle pH, electrolyte levels and water content in the black racer snake *Coluber constrictor*

| Variable                                    | 30 °C         | 10 °C             |
|---------------------------------------------|---------------|-------------------|
| pH                                          |               | 7.189±0.049* (10) |
| [Na <sup>+</sup> ] (mmol kg <sup>-1</sup> ) | 50.2±8.2 (13) | 37.8±6.4* (12)    |
| [K <sup>+</sup> ] (mmol kg <sup>-1</sup> )  | 77.4±8.1 (13) | 80.0±7.1 (12)     |
| [Cl <sup>-</sup> ] (mmol kg <sup>-1</sup> ) | 36.8±7.6 (13) | 25.1±4.6* (12)    |
| Water (%)                                   | 78.7±1.7 (9)  | 78.2±2.0 (12)     |

Values are means ± s.d.; numbers in parentheses are the number of animals sampled.

Each muscle sample was a combination of the transversospinalis, longissimus dorsi and iliolumbaris.

\*Indicates values that are significantly different ( $P < 0.05$ ) from those at 30 °C.

the  $x$ -intercept ( $-0.022 \text{ units } ^\circ\text{C}^{-1}$ ) represents the change in the mean whole-body ionization constant. Hence,  $\Delta\text{CO}_{2\text{WB}}/\Delta T = 8.24(-0.022 - \Delta\text{pHpl}/\Delta T)$ , which fits the general expression  $\Delta[\text{HCO}_3^-] = \beta_{\text{NB}}(\Delta\text{pK} - \Delta\text{pH})$ , but with the addition of dissolved  $\text{CO}_2$  (the effect of which is minor; see Table 3). While this explanation is speculative, it is interesting to note that the mean temperature coefficient for biological imidazole-like buffers is  $\Delta\text{pK}/\Delta T \approx -0.021 \text{ units } ^\circ\text{C}^{-1}$  (Edsall and Wyman, 1958), which is very close to the  $-0.022 \text{ units } ^\circ\text{C}^{-1}$  obtained in the present study. This implies that the postulated nonbicarbonate buffering is dominated by proteins (as opposed to phosphates, where  $\Delta\text{pK}/\Delta T = -0.0025 \text{ units } ^\circ\text{C}^{-1}$ ; Edsall and Wyman, 1958).

Increases in whole-body  $\text{CO}_2$  stores with cooling in reptiles and amphibians obviously represents  $\text{CO}_2$  (and hence carbonic acid) retention. However, within a given tissue compartment (e.g. extracellular fluid), a rise in  $[\text{HCO}_3^-]$  may not be accompanied by increases in  $[\text{H}^+]$  because the protons can be removed by ion-exchange mechanisms (e.g. by the kidney, stomach and skeletal muscle cells). If this were to occur, then there must be adjustments in the levels of other ions in order to preserve electroneutrality with the rise in  $[\text{HCO}_3^-]$ . The data contained in Tables 3 and 4 and Fig. 4 for plasma in *C. constrictor* clearly show that ion-exchange mechanisms were not involved. There were no changes in strong ion levels ( $\text{Na}^+$ ,  $\text{K}^+$ ,  $\text{Mg}^{2+}$ ,  $\text{Cl}^-$ ,  $\text{Ca}^{2+}$ ,  $\text{SO}_4^{2-}$  and lactate) or protein concentration, and phosphate concentration (a weak acid) actually increased with cooling. Thus, the  $3 \text{ mmol l}^{-1}$  increase in  $[\text{HCO}_3^-]$  was accompanied by an equivalent increase in  $[\text{H}^+]_{\text{pl}}$  that was buffered by the plasma proteins. The rise in phosphate concentration also titrated the plasma proteins. Consequently, net protein charge fell by 21%, from  $-0.48 \text{ mequiv g}^{-1} \text{ protein}$  at 30 °C to  $-0.38 \text{ mequiv g}^{-1} \text{ protein}$  at 10 °C. Plasma protein charge at 37 °C and pH 7.4 in humans is  $-0.6 \text{ mequiv g}^{-1} \text{ protein}$  (Figge *et al.* 1991b). Plasma strong ion levels have been shown to be independent of temperature in other air-breathing ectotherm species (Bickler, 1984; Herbert and Jackson, 1985; Douse and Mitchell, 1991).

The data in Table 3 also show that the change in  $[\text{CO}_2]_{\text{pl}}$

cannot be explained by simple increases in the solubility coefficients ( $\alpha_{\text{O}_2}$ ,  $\alpha_{\text{CO}_2}$ ) with cooling. Depending upon the *in vivo* steady-state  $P_{\text{O}_2}$  and  $P_{\text{CO}_2}$ , the increase in  $\alpha_{\text{O}_2}$  and  $\alpha_{\text{CO}_2}$  could potentially result in an accumulation of dissolved  $\text{O}_2$  and dissolved  $\text{CO}_2$ . This would have the effect of adding to the pulmonary  $\text{O}_2$  uptake and reducing the pulmonary  $\text{CO}_2$  elimination with cooling. Hence, the depression in RE and elevation in  $\text{CO}_2$  stores could be interpreted on the basis of the solubilities of the respiratory gases. However, inspection of Table 3 reveals that between 30 and 10 °C there was no change in dissolved  $[\text{CO}_2]_{\text{pl}}$  and dissolved  $[\text{O}_2]_{\text{pl}}$  decreased, because of the reductions in  $P_{\text{O}_2}$  and  $P_{\text{CO}_2}$ .

In previous reports, increases in extracellular  $\text{CO}_2$  stores at lower temperatures were attributed to ion-exchange mechanisms generating  $\text{HCO}_3^-$  (which is equivalent to removal of  $\text{H}^+$ ) (Stinner and Wardle, 1988; Stinner *et al.* 1994a, 1996). This view now appears to be incorrect. The suggestion of ion exchange was based upon the lengthy time courses for accumulation of  $\text{CO}_2$  in *C. constrictor* (35 h to reach steady state when cooled from 30 to 10 °C, and 60 h to reach steady state when cooled from 30 to 5 °C) and the relatively large changes in  $[\text{CO}_2]_{\text{pl}}$  which could not be accounted for by estimated extracellular fluid nonbicarbonate buffering (Stinner *et al.* 1996). However, the estimates of  $[\text{HCO}_3^-]$  generated from extracellular fluid nonbicarbonate buffers did not include  $\Delta\text{pK}/\Delta T$ , and it was assumed that interstitial fluid is free of proteins. This assumption is not consistent with the high protein concentrations reported for interstitial fluid and lymph in ectotherms (30–100% of plasma protein concentration; Hargens *et al.* 1974; Hillman *et al.* 1987). In mammals, the interstitial colloid osmotic pressure in loose connective tissue is approximately 50% of the plasma colloid osmotic pressure (Aukland and Reed, 1993). Thus, the estimated extracellular fluid  $\beta_{\text{NB}}$  was too low. Extracellular  $\beta_{\text{NB}}$  for *C. constrictor* can be obtained from the  $[\text{HCO}_3^-]_{\text{pl}}$  and pHpl values listed in Table 3 and an assumed  $\Delta\text{pK}/\Delta T$  of  $-0.022 \text{ units } ^\circ\text{C}^{-1}$ , where  $\beta_{\text{NB}} = \Delta[\text{HCO}_3^-]/(\Delta\text{pK} - \Delta\text{pH})$ . The resulting calculation yields an extracellular fluid  $\beta_{\text{NB}}$  of  $8.1 \text{ mmol l}^{-1} \text{ pH unit}^{-1}$ , which is close to the value of  $6.2 \text{ mmol l}^{-1} \text{ pH unit}^{-1}$  measured in the toad *B. marinus* (Boutilier *et al.* 1979). Hence, we conclude that nonbicarbonate buffering and  $\Delta\text{pKpr}/\Delta T$  account for the rise in  $[\text{HCO}_3^-]$  with cooling in *C. constrictor*.

A similar pattern for  $\text{CO}_2$  was found in skeletal muscle tissue of *C. constrictor* cooled from 30 to 10 °C.  $[\text{CO}_2]$  increased by approximately  $2.5 \text{ mmol kg}^{-1}$ , which is close to that measured in plasma. Skeletal muscle  $[\text{Na}^+]$  and  $[\text{Cl}^-]$  each decreased significantly by approximately  $12 \text{ mequiv l}^{-1}$ , but the small increase in  $[\text{K}^+]$  was not significant ( $P > 0.4$ ; Table 7). These changes in whole-muscle electrolyte levels suggest that there was a decrease in the fraction of extracellular fluid volume relative to intracellular fluid volume with cooling, as reported for *B. marinus* (Stinner *et al.* 1994a). Extracellular fluid, relative to intracellular fluid, is high in  $\text{Na}^+$  and  $\text{Cl}^-$  but low in  $\text{K}^+$ . Hence, a decrease in the fraction of extracellular fluid will produce a decrease in whole-muscle  $[\text{Na}^+]$  and  $[\text{Cl}^-]$ , and an



increase in whole-muscle [K<sup>+</sup>]. We conclude that the increase in [CO<sub>2</sub>] within the muscle resulted from an increase in [H<sub>2</sub>CO<sub>3</sub>] rather than from active ion exchange across the sarcolemma. The absolute value of the skeletal muscle  $\Delta\text{pHi}/\Delta T$  coefficient was greater than the  $\Delta\text{pHpl}/\Delta T$  coefficient (0.009 versus 0.003 units °C<sup>-1</sup>, respectively). In terms of our protein titration hypothesis, the higher absolute  $\Delta\text{pH}/\Delta T$  coefficient in skeletal muscle resulted from its higher  $\beta_{\text{NB}}$  (e.g. 19.8 mmol kg<sup>-1</sup> fresh mass pH unit<sup>-1</sup> in *B. marinus* skeletal muscle; Pörtner, 1990) compared with  $\beta_{\text{NB}}$  for extracellular fluid (approximately 8 mmol kg<sup>-1</sup> pH unit<sup>-1</sup> in *C. constrictor*). This higher buffering capacity is, however, partly offset by a lower absolute  $\Delta\text{pK}/\Delta T$  coefficient. In *C. constrictor*, the passive  $\Delta\text{pH}/\Delta T$  coefficient (and hence  $\Delta\text{pK}/\Delta T$ ) is -0.013 pH units °C<sup>-1</sup> compared with a plasma passive  $\Delta\text{pH}/\Delta T$  coefficient of approximately -0.019 pH units °C<sup>-1</sup> (Reeves, 1976). The result in skeletal muscle, relative to extracellular fluid, is that when cooled the passive component elevates pHi less but then the superimposed CO<sub>2</sub> retention lowers pHi very little so that the net  $\Delta\text{pHi}/\Delta T$  coefficient is greater than the  $\Delta\text{pHpl}/\Delta T$  coefficient.

In the discussion above, Fig. 3 was viewed as a whole-body nonbicarbonate buffer curve. Support for this conclusion in *C. constrictor* comes from the nearly identical value for the change in plasma [CO<sub>2</sub>] per unit change in plasma pH (-8.3 mmol l<sup>-1</sup> pH<sup>-1</sup>; Table 3) and the  $\Delta[\text{CO}_2]_{\text{WB}}/\Delta\text{pHpl}$  coefficient in Fig. 3 (-8.24 mmol l<sup>-1</sup> pH unit<sup>-1</sup>). The  $\Delta[\text{CO}_2]_{\text{pl}}/\Delta T$  in *C. constrictor* was not associated with ion exchange, but was instead apparently the result of the change in pK of the protein buffers (physicochemical buffering) and the change in P<sub>CO<sub>2</sub></sub> (ventilatory regulation). The same was also apparently true for the intracellular fluid of skeletal muscle. When cooled, reptiles and amphibians increase their air convection requirement and thus lower blood P<sub>CO<sub>2</sub></sub> (Ultsch and Jackson, 1996). CO<sub>2</sub> is lipid-soluble, it readily diffuses across cell membranes, and intracellular fluid P<sub>CO<sub>2</sub></sub> decreases in a parallel fashion. The  $\Delta[\text{CO}_2]/\Delta T$  coefficients of skeletal muscle in *C. constrictor* and in *R. catesbeiana* parallel the  $\Delta[\text{CO}_2]/\Delta T$  coefficients of plasma ([CO<sub>2</sub>]<sub>pl</sub> is independent of temperature in *R. catesbeiana*; Reeves, 1972). Also, changes in extracellular pH appear to correspond to changes in whole-body pH (Bickler, 1982; Cameron and Kormanik, 1982). Consequently, it is reasonable that the  $\Delta[\text{CO}_2]_{\text{WB}}/\Delta\text{pHpl}$  coefficient of Fig. 3 is similar in magnitude to the  $\Delta[\text{CO}_2]_{\text{pl}}/\Delta\text{pHpl}$  coefficient measured in *C. constrictor* (Table 3). Alternatively, the close agreement between the slope of Fig. 3 and  $\beta_{\text{NB}}$  estimated from Table 3 may simply be coincidental.

The absence of changes in strong ion levels refers to steady-state conditions, i.e. after the change in whole-body CO<sub>2</sub> stores has been completed. Presumably, the  $\Delta\text{pK}$  occurs virtually instantaneously with the  $\Delta T$  so that, during the nonsteady-state period, there are transient adjustments in plasma and intracellular fluid strong ion levels, such as the rise in plasma lactate concentration observed in *C. constrictor* during cooling (Stinner *et al.* 1996). However, when comparing steady-state

conditions, the  $\Delta\text{pK}/\Delta T$  accounts for CO<sub>2</sub> retention in plasma and cells, despite hyperventilation and a lowering of P<sub>CO<sub>2</sub></sub> with cooling. According to this hypothesis, individual differences in the  $\Delta[\text{CO}_2]/\Delta T$  coefficients among tissues, as found in *B. marinus* (Stinner *et al.* 1994a), result from differences in  $\beta_{\text{NB}}$  and/or differences in ( $\Delta\text{pK}-\Delta\text{pH}$ ).

In summary, on the basis of the findings of this study, titration of proteins with cooling occurs because the rising air convection requirement does not lower P<sub>CO<sub>2</sub></sub> sufficiently to maintain a constant ( $\Delta\text{pK}-\Delta\text{pH}$ )/ $\Delta T$ , i.e.  $-\Delta\text{pK}$  is greater than  $-\Delta\text{pH}$ . *C. constrictor* at 10 °C compared with 30 °C maintains a lower P<sub>CO<sub>2</sub></sub> by hyperventilating, but [CO<sub>2</sub>] is higher (Tables 3, 5) because of the thermally induced upward shift in pK. This protein titration hypothesis does not support general theories of acid-base regulation in ectotherms that are based upon preserving the same net protein charge irrespective of body temperature (i.e. constant relative alkalinity, alaphastat and z-stat; Austin *et al.* 1927; Howell *et al.* 1970; Reeves, 1972; Cameron, 1989). In the present study, only bullfrogs appear to conform closely to the alaphastat model, which predicts constant tissue CO<sub>2</sub> content. What effect, if any, CO<sub>2</sub> retention and changes in protein charge have upon enzyme activities and the physiology of these animals is unknown (Heisler, 1986b). There is a growing body of evidence that CO<sub>2</sub> retention (acidification) and low P<sub>O<sub>2</sub></sub> (see Table 3) are potent metabolic inhibitors in ectotherms (Boutilier *et al.* 1997; Guppy *et al.* 1994). Furthermore, mammalian hibernators exhibit a transient reduction in RE when entering torpor and a transient elevation in RE during arousal (Nestler, 1990). *C. constrictor* is native to all 48 contiguous North American states and extends into southern Canada and northern Mexico. Black racer snakes have a wide temperature range and are even somewhat active in hibernacula below 5 °C (Stinner, 1987; Sexton and Hunt, 1980). By contrast, bullfrogs (*R. catesbeiana*) show minimal changes in whole-body CO<sub>2</sub> stores, but they also occupy a wide range in North America and are active at near-freezing temperatures in ice-covered ponds during winter (Stinner *et al.* 1994b). The possible relationship between CO<sub>2</sub> retention, protein charge and behavior is an important topic that deserves careful study in the future.

The authors wish to thank Dr H. O. Pörtner for providing encouragement and valuable technical advice on the measurement of intracellular pH.

## References

- AUKLAND, K. AND REED, R. K. (1993). Interstitial-lymphatic mechanisms in the control of extracellular fluid volume. *Physiol. Rev.* **73**, 1-73.
- AUSTIN, J. H., SUNDERMAN, F. W. AND CAMACK, J. G. (1927). Studies in serum electrolytes. II. The electrolyte composition and the pH of serum of a poikilothermous animal at different temperatures. *J. biol. Chem.* **72**, 677-685.
- BICKLER, P. E. (1982). Intracellular pH in lizard *Dipsosaurus dorsalis*

- in relation to changing body temperatures. *J. appl. Physiol.* **53**, 1466–1472.
- BICKLER, P. E. (1984). Effects of temperature on acid and base excretion in a lizard, *Dipsosaurus dorsalis*. *J. comp. Physiol. B* **154**, 97–104.
- BOUTILIER, R. G., DONOHOE, P. H., TATTERSALL, G. J. AND WEST, T. G. (1997). Hypometabolic homeostasis in overwintering aquatic amphibians. *J. exp. Biol.* **200**, 387–400.
- BOUTILIER, R. G., EMILIO, M. G. AND SHELTON, G. (1986). The effects of mechanical work on electrolyte and water distribution in amphibian skeletal muscle. *J. exp. Biol.* **120**, 333–350.
- BOUTILIER, R. G., GLASS, M. L. AND HEISLER, N. (1987). Blood gases and extracellular/intracellular acid–base status as a function of temperature in the anuran amphibians *Xenopus laevis* and *Bufo marinus*. *J. exp. Biol.* **130**, 13–25.
- BOUTILIER, R. G., RANDALL, D. J., SHELTON, G. AND TOEWS, D. P. (1979). Acid–base relationships in the blood of the toad, *Bufo marinus*. *J. exp. Biol.* **82**, 331–344.
- CAMERON, J. N. (1989). Acid–base homeostasis: past and present perspectives. *Physiol. Zool.* **62**, 845–865.
- CAMERON, J. N. AND KORMANIK, G. A. (1982). Intracellular and extracellular acid–base status as a function of temperature in the freshwater channel catfish, *Ictalurus punctatus*. *J. exp. Biol.* **99**, 127–142.
- CHRISTOFORIDES, C., LAASBERG, L. H. AND HEDLEY-WHITE, J. (1969). Effect of temperature on solubility of O<sub>2</sub> in human plasma. *J. appl. Physiol.* **26**, 56–60.
- DOUSE, M. A. AND MITCHELL, G. S. (1991). Time course of temperature effects on arterial acid–base status in *Alligator mississippiensis*. *Respir. Physiol.* **83**, 87–102.
- EDSALL, J. T. AND WYMAN, J. (1958). *Biophysical Chemistry*, vol. 1. New York: Academic Press.
- FIGGE, J., MYDOSH, T. AND FENCL, V. (1991a). Serum proteins and acid–base equilibria: a follow-up. *J. Lab. clin. Med.* **117**, 713–719.
- FIGGE, J., ROSSING, T. H. AND FENCL, V. (1991b). The role of serum proteins in acid–base equilibria. *J. Lab. clin. Med.* **117**, 453–467.
- GUPPY, M., FUERY, C. J. AND FLANIGAN, J. E. (1994). Biochemical principles of metabolic depression. *Comp. Biochem. Physiol.* **109B**, 175–189.
- HARGENS, A. R., MILLARD, R. W. AND JOHANSEN, K. (1974). High capillary permeability in fishes. *Comp. Biochem. Physiol.* **48A**, 675–680.
- HEISLER, N. (1986a). Buffering and transmembrane ion transfer processes. In *Acid–Base Regulation in Animals* (ed. N. Heisler), pp. 3–47. Amsterdam: Elsevier Biomedical Press.
- HEISLER, N. (1986b). Comparative aspects of acid–base regulation. In *Acid–Base Regulation in Animals* (ed. N. Heisler), pp. 397–450. Amsterdam: Elsevier Biomedical Press.
- HEISLER, N. AND NEUMANN, P. (1980). The role of physico-chemical buffering and of bicarbonate transfer processes in intracellular pH regulation in response to changes of temperature in the larger spotted dogfish (*Scyliorhinus stellaris*). *J. exp. Biol.* **85**, 99–110.
- HERBERT, C. V. AND JACKSON, D. C. (1985). Temperature effects on the responses to prolonged submergence in the turtle *Chrysemys picta bellii*. I. Blood acid–base and ionic changes during and following anoxic submergence. *Physiol. Zool.* **58**, 655–669.
- HILLMAN, S. S., ZYGMUNT, A. AND BAUSTIAN, M. (1987). Transcapillary fluid forces during dehydration in two amphibians. *Physiol. Zool.* **60**, 339–345.
- HOWELL, B. J., BAUMGARDNER, F. W., BONDI, K. AND RAHN, H. (1970). Acid–base balance in cold blooded vertebrates as a function of body temperature. *Am. J. Physiol.* **218**, 600–606.
- JACKSON, D. C. (1986). Acid–base regulation of reptiles. In *Acid–Base Regulation in Animals* (ed. N. Heisler), pp. 235–263. Amsterdam: Elsevier Biomedical Press.
- NESTLER, J. R. (1990). Relationships between respiratory quotient and metabolic rate during entry to and arousal from daily torpor in deer mice (*Peromyscus maniculatus*). *Physiol. Zool.* **63**, 504–515.
- PÖRTNER, H. O. (1990). Determination of intracellular buffer values after metabolic inhibition by fluoride and nitrilotriacetic acid. *Respir. Physiol.* **81**, 275–288.
- PÖRTNER, H. O., BOUTILIER, R. G., TANG, Y. AND TOEWS, D. P. (1990). Determination of intracellular pH and after metabolic inhibition by fluoride and nitrilotriacetic acid. *Respir. Physiol.* **81**, 255–274.
- REEVES, R. B. (1972). An imidazole alaphastat hypothesis for vertebrate acid–base regulation: tissue carbon dioxide content and body temperature in bullfrogs. *Respir. Physiol.* **14**, 219–236.
- REEVES, R. B. (1976). Temperature-induced changes in blood acid–base status: pH and P<sub>CO<sub>2</sub></sub> in a binary buffer. *J. appl. Physiol.* **40**, 752–761.
- SEVERINGHAUS, J. W. (1965). Blood gas concentrations. In *Handbook of Physiology, Respiration*, vol. II (ed. W. O. Fenn and H. Rahn), pp. 1475–1487. Washington: American Physiological Society.
- SEXTON, O. J. AND HUNT, S. R. (1980). Temperature relationships and movements of snakes (*Elaphe obsoleta*, *Coluber constrictor*) in a cave hibernaculum. *Herpetologica* **36**, 20–26.
- SIGGAARD-ANDERSON, O. (1974). *The Acid-Base Status of the Blood*, 4th edn. Copenhagen: Munksgaard.
- STINNER, J. N. (1982). Ventilation, gas exchange and blood gases in the snake, *Pituophis melanoleucus*. *Respir. Physiol.* **47**, 279–298.
- STINNER, J. N. (1987). Cardiovascular and metabolic responses to temperature in *Coluber constrictor*. *Am. J. Physiol.* **253**, R222–R227.
- STINNER, J. N., GRGURIC, M. R. AND BEATY, S. L. (1996). Ventilatory and blood acid–base adjustments to a decrease in body temperature from 30 to 10 °C in black racer snakes *Coluber constrictor*. *J. exp. Biol.* **199**, 815–823.
- STINNER, J. N., NEWLON, D. L. AND HEISLER, N. (1994a). Extracellular and intracellular CO<sub>2</sub> concentration as a function of body temperature in the toad *Bufo marinus*. *J. exp. Biol.* **195**, 345–360.
- STINNER, J. N. AND WARDLE, R. L. (1988). Effect of temperature upon carbon dioxide stores in the snake *Coluber constrictor* and the turtle *Chrysemys scripta*. *J. exp. Biol.* **137**, 529–548.
- STINNER, J. N., ZARLINGA, N. AND ORCUTT, S. (1994b). Overwintering behavior of adult bullfrogs, *Rana catesbeiana*, in Northeastern Ohio. *Ohio J. Sci.* **94**, 8–13.
- ULTSCH, G. R. AND JACKSON, D. C. (1996). pH and temperature in ectothermic vertebrates. *Bull. Alabama Mus. nat. Hist.* **18**, 1–41.
- VAN DIJK, P. L. M., HARDEWIG, I. AND PÖRTNER, H. O. (1997). Temperature-dependent shift of p<sub>H<sub>i</sub></sub> in fish white muscle: contributions of passive and active processes. *Am. J. Physiol.* **272**, R84–R89.
